# Supplementary material
Source: Springer Nature journal article supplement (https://www.springermedizin.de/resource/supplementary/12911_2013_799_MOESM1_ESM.pdf/9526674)

DSCA (75)

Selected from EMR (79)

EMR (50,334)

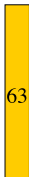

successfully matched

63

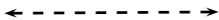

63

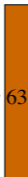

12

matched, but not selected from EMR

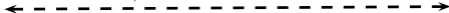

16

incorrectly selected from  
EMR, not matched

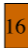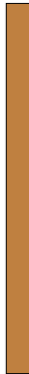

Supplement: MOESM1 [file 9526674]
